# Supplementary material for: Masking Ability of Various Metal Complexing Ligands at 1.0 mM Concentrations on the Potentiometric Determination of Fluoride in Aqueous Samples
Source: Hindawi journal article supplement (doi:10.1155/2020/6683309), 2020-12-18
Supplement: f1 [file 6683309.f1.pdf]

|    |       |       |       |       |       |       |       |       |       |       |       |       |       |       |       |       |       |       |       |       |       |       |       |       |       |       |       |       |
|----|-------|-------|-------|-------|-------|-------|-------|-------|-------|-------|-------|-------|-------|-------|-------|-------|-------|-------|-------|-------|-------|-------|-------|-------|-------|-------|-------|-------|
| 43 | 1.040 | 1.051 | 1.046 | 0.919 | 0.929 | 0.924 | 0.884 | 0.861 | 0.873 | 0.861 | 0.629 | 0.745 | 0.827 | 0.812 | 0.820 | 0.542 | 0.527 | 0.535 | 0.687 | 0.671 | 0.679 | 0.765 | 0.740 | 0.753 | 0.551 | 0.542 | 0.547 | 0.590 |
| 44 | 1.081 | 1.070 | 1.076 | 0.901 | 0.876 | 0.889 | 0.862 | 0.855 | 0.859 | 0.855 | 0.841 | 0.848 | 0.729 | 0.710 | 0.720 | 0.556 | 0.537 | 0.547 | 0.656 | 0.648 | 0.652 | 0.682 | 0.671 | 0.677 | 0.509 | 0.487 | 0.498 | 0.610 |
| 45 | 0.701 | 0.717 | 0.709 | 0.688 | 0.677 | 0.683 | 0.672 | 0.642 | 0.657 | 0.671 | 0.621 | 0.646 | 0.624 | 0.612 | 0.618 | 0.416 | 0.403 | 0.410 | 0.465 | 0.441 | 0.453 | 0.587 | 0.579 | 0.583 | 0.399 | 0.366 | 0.383 | 0.430 |
| 46 | 0.896 | 0.872 | 0.884 | 0.801 | 0.784 | 0.793 | 0.792 | 0.764 | 0.778 | 0.765 | 0.754 | 0.760 | 0.734 | 0.712 | 0.723 | 0.528 | 0.513 | 0.521 | 0.695 | 0.675 | 0.685 | 0.708 | 0.686 | 0.697 | 0.404 | 0.395 | 0.400 | 0.670 |
| 47 | 0.796 | 0.771 | 0.784 | 0.691 | 0.682 | 0.687 | 0.646 | 0.638 | 0.642 | 0.604 | 0.588 | 0.596 | 0.578 | 0.554 | 0.566 | 0.446 | 0.431 | 0.439 | 0.522 | 0.513 | 0.518 | 0.561 | 0.548 | 0.555 | 0.415 | 0.405 | 0.410 | 0.490 |
| 48 | 1.089 | 1.077 | 1.083 | 0.892 | 0.868 | 0.880 | 0.882 | 0.843 | 0.863 | 0.768 | 0.745 | 0.757 | 0.564 | 0.532 | 0.548 | 0.599 | 0.566 | 0.583 | 0.686 | 0.671 | 0.679 | 0.704 | 0.683 | 0.694 | 0.590 | 0.581 | 0.586 | 0.670 |
| 49 | 0.787 | 0.755 | 0.771 | 0.657 | 0.642 | 0.650 | 0.455 | 0.426 | 0.441 | 0.463 | 0.449 | 0.456 | 0.416 | 0.400 | 0.408 | 0.292 | 0.276 | 0.284 | 0.366 | 0.344 | 0.355 | 0.394 | 0.376 | 0.385 | 0.289 | 0.272 | 0.281 | 0.280 |
| 50 | 0.813 | 0.829 | 0.821 | 0.781 | 0.773 | 0.777 | 0.764 | 0.741 | 0.753 | 0.711 | 0.700 | 0.706 | 0.682 | 0.662 | 0.672 | 0.366 | 0.348 | 0.357 | 0.572 | 0.549 | 0.561 | 0.593 | 0.581 | 0.587 | 0.295 | 0.280 | 0.288 | 0.540 |
| 51 | 0.849 | 0.879 | 0.864 | 0.725 | 0.712 | 0.719 | 0.668 | 0.643 | 0.656 | 0.427 | 0.413 | 0.420 | 0.627 | 0.613 | 0.620 | 0.434 | 0.413 | 0.424 | 0.556 | 0.538 | 0.547 | 0.598 | 0.579 | 0.589 | 0.416 | 0.401 | 0.409 | 0.520 |
| 52 | 0.942 | 0.924 | 0.933 | 0.826 | 0.813 | 0.820 | 0.791 | 0.766 | 0.779 | 0.763 | 0.766 | 0.765 | 0.724 | 0.712 | 0.718 | 0.552 | 0.536 | 0.544 | 0.695 | 0.677 | 0.686 | 0.709 | 0.689 | 0.699 | 0.464 | 0.450 | 0.457 | 0.620 |
| 53 | 0.815 | 0.828 | 0.822 | 0.741 | 0.713 | 0.727 | 0.726 | 0.718 | 0.722 | 0.708 | 0.688 | 0.698 | 0.645 | 0.621 | 0.633 | 0.472 | 0.456 | 0.464 | 0.582 | 0.572 | 0.577 | 0.633 | 0.625 | 0.629 | 0.363 | 0.350 | 0.357 | 0.570 |
| 54 | 1.084 | 1.105 | 1.095 | 0.886 | 0.846 | 0.866 | 0.829 | 0.813 | 0.821 | 0.754 | 0.724 | 0.739 | 0.726 | 0.716 | 0.721 | 0.457 | 0.448 | 0.453 | 0.699 | 0.681 | 0.690 | 0.708 | 0.694 | 0.701 | 0.462 | 0.451 | 0.457 | 0.610 |
| 55 | 1.419 | 1.404 | 1.412 | 1.301 | 1.286 | 1.294 | 1.285 | 1.267 | 1.276 | 1.189 | 1.185 | 1.187 | 1.139 | 1.127 | 1.133 | 0.959 | 0.928 | 0.944 | 1.011 | 0.994 | 1.003 | 1.169 | 1.151 | 1.160 | 0.825 | 0.813 | 0.819 | 0.950 |
| 56 | 0.842 | 0.828 | 0.835 | 0.822 | 0.811 | 0.817 | 0.710 | 0.726 | 0.718 | 0.830 | 0.821 | 0.826 | 0.633 | 0.619 | 0.626 | 0.467 | 0.438 | 0.453 | 0.568 | 0.543 | 0.556 | 0.583 | 0.572 | 0.578 | 0.411 | 0.405 | 0.408 | 0.544 |
| 57 | 1.099 | 1.088 | 1.094 | 0.845 | 0.826 | 0.836 | 0.876 | 0.854 | 0.865 | 0.844 | 0.821 | 0.833 | 0.816 | 0.808 | 0.812 | 0.622 | 0.612 | 0.617 | 0.722 | 0.713 | 0.718 | 0.793 | 0.773 | 0.783 | 0.556 | 0.541 | 0.549 | 0.680 |
| 58 | 0.820 | 0.836 | 0.828 | 0.761 | 0.742 | 0.752 | 0.792 | 0.769 | 0.781 | 0.689 | 0.668 | 0.679 | 0.641 | 0.627 | 0.634 | 0.338 | 0.313 | 0.326 | 0.565 | 0.539 | 0.552 | 0.636 | 0.618 | 0.627 | 0.229 | 0.216 | 0.223 | 0.340 |
| 59 | 0.899 | 0.885 | 0.892 | 0.885 | 0.855 | 0.870 | 0.739 | 0.713 | 0.726 | 0.667 | 0.628 | 0.648 | 0.632 | 0.644 | 0.638 | 0.429 | 0.413 | 0.421 | 0.456 | 0.435 | 0.446 | 0.446 | 0.432 | 0.439 | 0.406 | 0.383 | 0.395 | 0.380 |
| 60 | 0.891 | 0.845 | 0.868 | 0.755 | 0.734 | 0.745 | 0.676 | 0.655 | 0.666 | 0.638 | 0.613 | 0.626 | 0.589 | 0.603 | 0.596 | 0.348 | 0.325 | 0.337 | 0.508 | 0.528 | 0.518 | 0.522 | 0.513 | 0.518 | 0.428 | 0.416 | 0.422 | 0.400 |
